# Supplementary material for: Research on body image cognition, social support and illness perception in breast cancer patients with different surgical methods
Source: Front Psychol. 2022 Sep 23;13:931679. doi: 10.3389/fpsyg.2022.931679 (PMC9540219; doi:10.3389/fpsyg.2022.931679)
Supplement: Supplementary file 1 [file Table_1.XLSX]

## Sheet: characteristics
No.	Age	Marital status	Resident	Occupation	Education	Family income	Stage of cancer	Time since diagnosis	Surgery	Current Therapy
1	32	married	rural	no fixed job	below junior school	<3000	Ⅱ	1-3 months	RM	Chemotherapy
2	33	married	urban	no fixed job	senior high school	3000-5000	Ⅱ	<1 month	RM	Chemotherapy
3	58	married	urban	no fixed job	below junior school	3000-5000	Ⅱ	<1 month	RM	Radiation, targeted therapy or endocrine-therapy
4	49	divorced	urban	no fixed job	below junior school	<3000	Ⅱ	1-3 months	MRM	Chemotherapy
5	76	widowed	urban	no fixed job	below junior school	<3000	Ⅲ	<1 month	RM	Radiation, targeted therapy or endocrine-therapy
6	53	married	rural	no fixed job	below junior school	<3000	Ⅱ	3-6months	MRM	Chemotherapy
7	33	married	urban	fixed job	college and university	>5000	Ⅱ	3-6months	BCS	Radiation, targeted therapy or endocrine-therapy
8	45	divorced	rural	no fixed job	below junior school	<3000	Ⅱ	<1 month	RM	Radiation, targeted therapy or endocrine-therapy
9	59	married	rural	no fixed job	below junior school	<3000	Ⅱ	1-3 months	MRM	Chemotherapy
10	40	divorced	rural	no fixed job	below junior school	<3000	Ⅲ	3-6months	MRM	Chemotherapy
11	59	married	urban	no fixed job	senior high school	<3000	Ⅲ	1-3 months	MRM	Chemotherapy
12	58	married	rural	no fixed job	below junior school	<3000	Ⅱ	>6 months	MRM	Radiation, targeted therapy or endocrine-therapy
13	36	married	urban	fixed job	senior high school	3000-5000	Ⅱ	3-6months	BCS	Chemotherapy
14	31	married	urban	fixed job	college and university	3000-5000	Ⅲ	>6 months	BCS	Radiation, targeted therapy or endocrine-therapy
15	55	married	rural	no fixed job	below junior school	<3000	Ⅱ	1-3 months	MRM	Chemotherapy
16	56	married	urban	no fixed job	below junior school	3000-5000	Ⅱ	1-3 months	MRM	Chemotherapy
17	51	married	rural	no fixed job	below junior school	<3000	Ⅱ	1-3 months	MRM	Chemotherapy
18	54	married	rural	fixed job	below junior school	<3000	Ⅲ	1-3 months	MRM	Chemotherapy
19	57	married	rural	no fixed job	below junior school	<3000	Ⅲ	>6 months	MRM	Chemotherapy
20	49	married	rural	no fixed job	below junior school	<3000	Ⅰ	3-6months	MRM	Chemotherapy
21	60	widowed	rural	no fixed job	below junior school	<3000	Ⅱ	1-3 months	MRM	Chemotherapy
22	43	married	urban	no fixed job	senior high school	3000-5000	Ⅱ	3-6months	MRM	Radiation, targeted therapy or endocrine-therapy
23	40	married	urban	no fixed job	senior high school	3000-5000	Ⅲ	>6 months	MRM	Chemotherapy
24	52	married	rural	no fixed job	below junior school	<3000	Ⅳ	>6 months	RM	Chemotherapy
25	57	married	rural	no fixed job	below junior school	<3000	Ⅱ	3-6months	BCS	Chemotherapy
26	47	married	rural	no fixed job	senior high school	<3000	Ⅲ	3-6months	MRM	Chemotherapy
27	46	widowed	urban	no fixed job	senior high school	3000-5000	Ⅱ	3-6months	MRM	Chemotherapy
28	51	married	rural	no fixed job	below junior school	<3000	Ⅲ	3-6months	MRM	Chemotherapy
29	47	married	rural	no fixed job	below junior school	<3000	Ⅱ	1-3 months	MRM	Chemotherapy
30	50	divorced	urban	no fixed job	below junior school	<3000	Ⅱ	>6 months	MRM	Chemotherapy
31	52	divorced	urban	fixed job	below junior school	3000-5000	Ⅱ	3-6months	MRM	Chemotherapy
32	51	married	urban	no fixed job	below junior school	<3000	Ⅱ	3-6months	MRM	Chemotherapy
33	35	married	urban	no fixed job	below junior school	3000-5000	Ⅰ	<1 month	RM	Radiation, targeted therapy or endocrine-therapy
34	58	married	urban	fixed job	college and university	3000-5000	Ⅱ	1-3 months	MRM	Chemotherapy
35	44	married	rural	no fixed job	below junior school	<3000	Ⅱ	3-6months	RM	Chemotherapy
36	50	married	urban	fixed job	college and university	>5000	Ⅱ	3-6months	MRM	Chemotherapy
37	49	married	urban	no fixed job	below junior school	3000-5000	Ⅱ	<1 month	RM	Chemotherapy
38	55	widowed	rural	no fixed job	below junior school	3000-5000	Ⅱ	>6 months	MRM	Chemotherapy
39	57	married	urban	fixed job	senior high school	3000-5000	Ⅱ	>6 months	MRM	Chemotherapy
40	45	married	rural	no fixed job	below junior school	<3000	Ⅱ	3-6months	MRM	Chemotherapy
41	47	divorced	urban	fixed job	senior high school	3000-5000	Ⅱ	>6 months	MRM	Chemotherapy
42	50	married	rural	no fixed job	below junior school	<3000	Ⅱ	1-3 months	MRM	Chemotherapy
43	64	married	rural	no fixed job	senior high school	<3000	Ⅲ	3-6months	RM	Chemotherapy
44	54	divorced	urban	fixed job	below junior school	3000-5000	Ⅱ	>6 months	MRM	Radiation, targeted therapy or endocrine-therapy
45	53	married	rural	no fixed job	below junior school	<3000	Ⅱ	<1 month	MRM	Chemotherapy
46	31	married	urban	fixed job	college and university	>5000	Ⅳ	<1 month	MRM	Radiation, targeted therapy or endocrine-therapy
47	45	married	urban	fixed job	college and university	>5000	Ⅱ	1-3 months	MRM	Chemotherapy
48	45	married	urban	fixed job	below junior school	>5000	Ⅱ	3-6months	BCS	Chemotherapy
49	49	married	rural	no fixed job	below junior school	<3000	Ⅱ	<1 month	MRM	Chemotherapy
50	39	married	rural	no fixed job	below junior school	<3000	Ⅰ	>6 months	MRM	Radiation, targeted therapy or endocrine-therapy
51	44	married	urban	fixed job	senior high school	>5000	Ⅰ	3-6months	RM	Chemotherapy
52	45	married	urban	no fixed job	below junior school	<3000	Ⅲ	3-6months	MRM	Chemotherapy
53	56	married	rural	no fixed job	below junior school	<3000	Ⅱ	3-6months	MRM	Radiation, targeted therapy or endocrine-therapy
54	40	married	urban	fixed job	senior high school	3000-5000	Ⅰ	<1 month	MRM	Radiation, targeted therapy or endocrine-therapy
55	58	married	rural	no fixed job	below junior school	<3000	Ⅱ	>6 months	MRM	Chemotherapy
56	56	married	urban	no fixed job	below junior school	3000-5000	Ⅰ	>6 months	BCS	Radiation, targeted therapy or endocrine-therapy
57	54	married	rural	no fixed job	below junior school	<3000	Ⅱ	>6 months	MRM	Chemotherapy
58	36	married	urban	no fixed job	senior high school	3000-5000	Ⅱ	3-6months	BCS	Chemotherapy
59	38	married	urban	no fixed job	below junior school	3000-5000	Ⅱ	1-3 months	RM	Chemotherapy
60	53	married	rural	no fixed job	senior high school	3000-5000	Ⅱ	<1 month	MRM	Chemotherapy
61	43	married	urban	no fixed job	below junior school	3000-5000	Ⅱ	<1 month	RM	Radiation, targeted therapy or endocrine-therapy
62	45	married	rural	no fixed job	below junior school	<3000	Ⅱ	3-6months	MRM	Chemotherapy
63	31	married	urban	no fixed job	college and university	3000-5000	Ⅲ	<1 month	BCS	Radiation, targeted therapy or endocrine-therapy
64	54	married	urban	no fixed job	below junior school	3000-5000	Ⅱ	<1 month	MRM	Chemotherapy
65	59	widowed	urban	fixed job	college and university	3000-5000	Ⅰ	<1 month	MRM	Chemotherapy
66	54	married	urban	no fixed job	below junior school	<3000	Ⅲ	1-3 months	MRM	Radiation, targeted therapy or endocrine-therapy
67	49	married	rural	no fixed job	below junior school	<3000	Ⅱ	<1 month	MRM	Chemotherapy
68	55	married	urban	fixed job	below junior school	3000-5000	Ⅱ	>6 months	MRM	Chemotherapy
69	58	married	rural	no fixed job	below junior school	<3000	Ⅱ	1-3 months	MRM	Chemotherapy
70	45	married	urban	fixed job	below junior school	>5000	Ⅱ	3-6months	MRM	Chemotherapy
71	64	married	urban	no fixed job	below junior school	3000-5000	Ⅱ	<1 month	RM	Chemotherapy
72	58	married	rural	no fixed job	below junior school	<3000	Ⅱ	3-6months	MRM	Chemotherapy
73	59	married	rural	no fixed job	below junior school	<3000	Ⅱ	3-6months	MRM	Radiation, targeted therapy or endocrine-therapy
74	42	married	urban	no fixed job	below junior school	3000-5000	Ⅱ	>6 months	MRM	Radiation, targeted therapy or endocrine-therapy
75	50	married	rural	no fixed job	below junior school	<3000	Ⅱ	>6 months	BCS	Radiation, targeted therapy or endocrine-therapy
76	51	married	rural	no fixed job	below junior school	<3000	Ⅱ	3-6months	MRM	Chemotherapy
77	52	married	rural	no fixed job	below junior school	<3000	Ⅲ	<1 month	BCS	Chemotherapy
78	37	divorced	urban	fixed job	college and university	>5000	Ⅱ	3-6months	MRM	Radiation, targeted therapy or endocrine-therapy
79	66	married	rural	no fixed job	below junior school	<3000	Ⅳ	>6 months	MRM	Chemotherapy
80	68	married	rural	no fixed job	below junior school	<3000	Ⅱ	>6 months	MRM	Chemotherapy
81	49	married	urban	no fixed job	below junior school	3000-5000	Ⅱ	3-6months	MRM	Chemotherapy
82	55	married	rural	no fixed job	below junior school	<3000	Ⅱ	3-6months	MRM	Chemotherapy
83	41	married	urban	no fixed job	senior high school	3000-5000	Ⅱ	3-6months	BCS	Radiation, targeted therapy or endocrine-therapy
84	51	married	urban	fixed job	college and university	>5000	Ⅱ	3-6months	MRM	Chemotherapy
85	52	married	rural	no fixed job	below junior school	<3000	Ⅱ	<1 month	MRM	Chemotherapy
86	37	married	urban	fixed job	college and university	>5000	Ⅱ	<1 month	RM	Radiation, targeted therapy or endocrine-therapy
87	41	married	urban	fixed job	below junior school	3000-5000	Ⅲ	1-3 months	MRM	Chemotherapy
88	70	married	rural	no fixed job	below junior school	<3000	Ⅲ	>6 months	MRM	Chemotherapy
89	40	married	urban	no fixed job	below junior school	<3000	Ⅲ	>6 months	MRM	Radiation, targeted therapy or endocrine-therapy
90	43	married	rural	no fixed job	below junior school	<3000	Ⅱ	1-3 months	MRM	Radiation, targeted therapy or endocrine-therapy
91	65	married	urban	no fixed job	below junior school	3000-5000	Ⅱ	>6 months	MRM	Chemotherapy
92	66	married	rural	no fixed job	senior high school	>5000	Ⅲ	>6 months	MRM	Chemotherapy
93	45	married	urban	no fixed job	below junior school	>5000	Ⅲ	>6 months	MRM	Chemotherapy
94	42	married	urban	fixed job	below junior school	3000-5000	Ⅱ	<1 month	MRM	Chemotherapy
95	31	married	urban	no fixed job	below junior school	3000-5000	Ⅲ	1-3 months	MRM	Chemotherapy
96	40	married	urban	no fixed job	senior high school	3000-5000	Ⅲ	1-3 months	MRM	Chemotherapy
97	48	married	rural	no fixed job	below junior school	<3000	Ⅱ	<1 month	MRM	Chemotherapy
98	61	married	rural	no fixed job	below junior school	<3000	Ⅱ	>6 months	MRM	Chemotherapy
99	39	married	urban	fixed job	college and university	>5000	Ⅱ	<1 month	BCS	Chemotherapy
100	59	married	urban	no fixed job	below junior school	3000-5000	Ⅲ	1-3 months	MRM	Chemotherapy
101	44	married	urban	no fixed job	below junior school	3000-5000	Ⅱ	<1 month	RM	Chemotherapy
102	49	married	urban	no fixed job	below junior school	3000-5000	Ⅱ	>6 months	BCS	Radiation, targeted therapy or endocrine-therapy
103	50	married	rural	no fixed job	below junior school	<3000	Ⅲ	<1 month	MRM	Chemotherapy
104	40	married	urban	fixed job	college and university	>5000	Ⅰ	1-3 months	BCS	Radiation, targeted therapy or endocrine-therapy
105	57	widowed	rural	no fixed job	below junior school	<3000	Ⅲ	>6 months	MRM	Radiation, targeted therapy or endocrine-therapy
106	51	married	rural	no fixed job	below junior school	<3000	Ⅱ	1-3 months	MRM	Chemotherapy
107	43	married	rural	no fixed job	below junior school	<3000	Ⅱ	3-6months	MRM	Chemotherapy
108	64	married	rural	no fixed job	senior high school	3000-5000	Ⅱ	3-6months	MRM	Chemotherapy
109	47	married	rural	no fixed job	below junior school	<3000	Ⅱ	<1 month	RM	Chemotherapy
110	56	married	rural	no fixed job	below junior school	<3000	Ⅱ	<1 month	RM	Radiation, targeted therapy or endocrine-therapy
111	47	married	urban	fixed job	below junior school	3000-5000	Ⅱ	<1 month	MRM	Chemotherapy
112	50	married	rural	no fixed job	below junior school	<3000	Ⅱ	3-6months	MRM	Radiation, targeted therapy or endocrine-therapy
113	49	married	urban	no fixed job	below junior school	3000-5000	Ⅲ	1-3 months	MRM	Chemotherapy
114	52	married	urban	fixed job	below junior school	3000-5000	Ⅱ	3-6months	BCS	Chemotherapy
115	51	married	rural	no fixed job	below junior school	<3000	Ⅱ	1-3 months	RM	Chemotherapy
116	45	married	urban	fixed job	college and university	>5000	Ⅱ	<1 month	MRM	Chemotherapy
117	37	married	urban	fixed job	college and university	>5000	Ⅲ	3-6months	BCS	Radiation, targeted therapy or endocrine-therapy
118	46	married	rural	no fixed job	below junior school	<3000	Ⅱ	<1 month	RM	Chemotherapy
119	45	married	rural	no fixed job	below junior school	<3000	Ⅱ	3-6months	MRM	Chemotherapy
120	45	married	rural	no fixed job	below junior school	<3000	Ⅱ	>6 months	MRM	Chemotherapy
121	56	married	rural	no fixed job	below junior school	3000-5000	Ⅱ	<1 month	RM	Chemotherapy
122	51	married	rural	no fixed job	below junior school	<3000	Ⅱ	>6 months	MRM	Radiation, targeted therapy or endocrine-therapy
123	50	married	rural	no fixed job	senior high school	3000-5000	Ⅱ	<1 month	RM	Radiation, targeted therapy or endocrine-therapy
124	49	married	rural	no fixed job	below junior school	<3000	Ⅲ	3-6months	MRM	Chemotherapy
125	45	married	urban	fixed job	below junior school	3000-5000	Ⅱ	3-6months	MRM	Chemotherapy
126	54	widowed	rural	no fixed job	below junior school	3000-5000	Ⅱ	1-3 months	MRM	Chemotherapy
127	64	married	rural	no fixed job	below junior school	3000-5000	Ⅱ	>6 months	MRM	Chemotherapy
128	56	married	rural	no fixed job	senior high school	3000-5000	Ⅱ	>6 months	MRM	Radiation, targeted therapy or endocrine-therapy
129	41	married	urban	fixed job	college and university	>5000	Ⅱ	1-3 months	MRM	Chemotherapy
130	52	married	urban	no fixed job	senior high school	3000-5000	Ⅲ	3-6months	MRM	Chemotherapy
131	59	widowed	rural	no fixed job	below junior school	<3000	Ⅱ	1-3 months	MRM	Radiation, targeted therapy or endocrine-therapy
132	45	married	urban	fixed job	below junior school	3000-5000	Ⅱ	3-6months	BCS	Chemotherapy
133	67	married	rural	no fixed job	below junior school	3000-5000	Ⅲ	>6 months	MRM	Chemotherapy
134	58	married	rural	no fixed job	below junior school	<3000	Ⅲ	1-3 months	MRM	Chemotherapy
135	45	married	urban	no fixed job	college and university	>5000	Ⅱ	<1 month	MRM	Chemotherapy
136	45	married	rural	no fixed job	below junior school	3000-5000	Ⅲ	3-6months	MRM	Chemotherapy
137	49	married	urban	fixed job	college and university	>5000	Ⅲ	3-6months	MRM	Chemotherapy
138	55	married	rural	no fixed job	below junior school	3000-5000	Ⅱ	1-3 months	MRM	Chemotherapy
139	54	married	urban	fixed job	below junior school	3000-5000	Ⅱ	1-3 months	MRM	Chemotherapy
140	45	married	rural	no fixed job	below junior school	3000-5000	Ⅱ	1-3 months	RM	Chemotherapy
141	52	married	rural	no fixed job	below junior school	3000-5000	Ⅱ	3-6months	MRM	Chemotherapy
142	54	married	rural	no fixed job	below junior school	<3000	Ⅱ	3-6months	MRM	Chemotherapy
143	58	married	urban	no fixed job	below junior school	>5000	Ⅱ	>6 months	MRM	Radiation, targeted therapy or endocrine-therapy
144	37	married	urban	fixed job	college and university	>5000	Ⅱ	>6 months	BCS	Radiation, targeted therapy or endocrine-therapy
145	59	married	rural	no fixed job	below junior school	3000-5000	Ⅱ	1-3 months	MRM	Chemotherapy
146	65	married	rural	no fixed job	below junior school	<3000	Ⅱ	<1 month	MRM	Chemotherapy
147	62	widowed	rural	no fixed job	below junior school	<3000	Ⅰ	3-6months	MRM	Chemotherapy
148	58	married	rural	no fixed job	below junior school	3000-5000	Ⅲ	>6 months	MRM	Radiation, targeted therapy or endocrine-therapy
149	50	married	rural	no fixed job	below junior school	<3000	Ⅱ	3-6months	RM	Chemotherapy
150	58	married	rural	fixed job	below junior school	3000-5000	Ⅱ	1-3 months	MRM	Chemotherapy
151	51	married	urban	no fixed job	below junior school	>5000	Ⅲ	<1 month	BCS	Chemotherapy
152	51	married	rural	no fixed job	below junior school	<3000	Ⅱ	1-3 months	MRM	Chemotherapy
153	43	married	urban	no fixed job	senior high school	>5000	Ⅱ	<1 month	BCS	Chemotherapy
154	53	married	rural	no fixed job	below junior school	<3000	Ⅱ	1-3 months	MRM	Chemotherapy
155	45	married	urban	fixed job	below junior school	3000-5000	Ⅱ	>6 months	MRM	Radiation, targeted therapy or endocrine-therapy
156	45	married	rural	no fixed job	below junior school	<3000	Ⅱ	3-6months	MRM	Chemotherapy
157	43	married	urban	no fixed job	below junior school	3000-5000	Ⅲ	>6 months	BCS	Radiation, targeted therapy or endocrine-therapy

## Sheet: BIPQ
No.	1	2	3	3’	4	4‘	5	6	7	7’	8	Cognition	Emotion	Comprehensibility	Total score
1	3	3	4	6	3	7	0	2	4	6	5	19	7	6	32
2	8	2	8	2	8	2	6	2	7	3	3	20	5	3	28
3	10	9	9	1	9	1	2	9	9	1	7	23	16	1	40
4	10	9	8	2	4	6	7	10	3	7	9	34	19	7	60
5	10	9	2	8	8	2	3	6	4	6	8	32	14	6	52
6	10	1	7	3	7	3	2	2	9	1	8	19	10	1	30
7	7	5	8	2	8	2	5	2	2	8	2	21	4	8	33
8	8	5	8	2	8	2	6	10	9	1	9	23	19	1	43
9	9	10	7	3	7	3	1	3	4	6	2	26	5	6	37
10	10	9	6	4	6	4	2	10	9	1	3	29	13	1	43
11	7	5	8	2	8	2	3	2	1	9	1	19	3	9	31
12	9	7	9	1	9	1	2	2	2	8	1	20	3	8	31
13	8	5	9	1	9	1	3	10	9	1	5	18	15	1	34
14	8	5	7	3	7	3	3	5	10	0	10	22	15	0	37
15	4	8	9	1	9	1	3	4	3	7	1	17	5	7	29
16	9	9	8	2	8	2	7	9	9	1	8	29	17	1	47
17	10	7	5	5	5	5	7	9	9	1	10	34	19	1	54
18	10	8	6	4	7	3	6	10	10	0	3	31	13	0	44
19	8	10	8	2	8	2	3	7	2	8	2	25	9	8	42
20	8	9	9	1	9	1	2	5	1	9	2	21	7	9	37
21	10	9	9	1	9	1	3	8	3	7	9	24	17	7	48
22	7	4	8	2	8	2	2	2	5	5	2	17	4	5	26
23	6	5	9	1	9	1	1	2	2	8	1	14	3	8	25
24	10	10	5	5	3	7	2	8	2	8	9	34	17	8	59
25	9	6	8	2	7	3	8	2	7	3	8	28	10	3	41
26	10	7	9	1	9	1	5	10	9	1	9	24	19	1	44
27	10	10	5	5	5	5	8	10	9	1	10	38	20	1	59
28	9	5	7	3	7	3	2	9	9	1	1	22	10	1	33
29	5	10	7	3	7	3	3	3	2	8	1	24	4	8	36
30	6	5	5	5	5	5	7	9	8	2	1	28	10	2	40
31	10	8	5	5	5	5	3	9	10	0	6	31	15	0	46
32	9	7	8	2	8	2	1	10	9	1	3	21	13	1	35
33	2	2	8	2	8	2	0	5	1	9	4	8	9	9	26
34	9	8	6	4	7	3	1	9	9	1	6	25	15	1	41
35	8	5	7	3	6	4	1	7	7	3	2	21	9	3	33
36	6	7	8	2	8	2	3	4	7	3	3	20	7	3	30
37	9	0	7	3	7	3	2	9	2	8	5	17	14	8	39
38	10	9	7	3	7	3	6	2	2	8	8	31	10	8	49
39	4	9	5	5	7	3	7	2	2	8	3	28	5	8	41
40	4	5	8	2	9	1	6	3	6	4	2	18	5	4	27
41	10	10	7	3	8	2	7	5	7	3	10	32	15	3	50
42	7	4	5	5	5	5	1	8	8	2	3	22	11	2	35
43	7	4	9	1	9	1	0	1	1	9	1	13	2	9	24
44	2	4	8	2	8	2	5	9	9	1	6	15	15	1	31
45	10	3	5	5	5	5	2	2	1	9	3	25	5	9	39
46	7	9	7	3	8	2	5	1	1	9	1	26	2	9	37
47	6	7	7	3	6	4	8	7	8	2	2	28	9	2	39
48	2	6	9	1	10	0	5	1	1	9	0	14	1	9	24
49	6	8	8	2	5	5	3	1	2	8	8	24	9	8	41
50	6	3	8	2	9	1	2	6	8	2	2	14	8	2	24
51	4	7	7	3	7	3	2	9	9	1	5	19	14	1	34
52	10	2	7	3	7	3	5	9	9	1	7	23	16	1	40
53	3	5	4	6	4	6	2	8	8	2	3	22	11	2	35
54	6	3	5	5	5	5	0	9	6	4	5	19	14	4	37
55	9	8	8	2	8	2	2	6	7	3	8	23	14	3	40
56	2	1	5	5	5	5	0	1	7	3	6	13	7	3	23
57	7	5	9	1	9	1	3	10	1	9	9	17	19	9	45
58	8	3	7	3	7	3	1	9	9	1	9	18	18	1	37
59	5	4	8	2	8	2	2	9	9	1	5	15	14	1	30
60	9	1	9	1	9	1	5	3	2	8	9	17	12	8	37
61	5	7	3	7	3	7	5	9	1	9	1	31	10	9	50
62	8	5	6	4	6	4	1	1	1	9	6	22	7	9	38
63	5	5	7	3	6	4	2	1	5	5	2	19	3	5	27
64	9	9	9	1	9	1	1	8	6	4	7	21	15	4	40
65	8	6	8	2	8	2	1	1	3	7	5	19	6	7	32
66	2	2	10	0	10	0	1	9	9	1	1	5	10	1	16
67	7	8	8	2	8	2	1	9	5	5	4	20	13	5	38
68	2	1	8	2	8	2	1	6	2	8	2	8	8	8	24
69	10	5	4	6	4	6	5	1	1	9	10	32	11	9	52
70	6	5	9	1	9	1	1	1	1	9	2	14	3	9	26
71	3	5	7	3	7	3	2	1	1	9	2	16	3	9	28
72	9	5	9	1	9	1	1	1	1	9	6	17	7	9	33
73	8	5	9	1	9	1	4	9	7	3	4	19	13	3	35
74	9	6	8	2	8	2	3	10	2	8	10	22	20	8	50
75	5	5	7	3	7	3	4	5	3	7	9	20	14	7	41
76	10	5	7	3	7	3	2	9	1	9	10	23	19	9	51
77	3	4	7	3	7	3	1	6	4	6	2	14	8	6	28
78	6	8	6	4	6	4	1	2	6	4	1	23	3	4	30
79	7	8	6	4	6	4	5	2	2	8	5	28	7	8	43
80	9	5	9	1	9	1	3	2	7	3	4	19	6	3	28
81	10	7	6	4	6	4	1	10	8	2	9	26	19	2	47
82	8	2	5	5	5	5	4	7	7	3	3	24	10	3	37
83	7	9	9	1	9	1	2	6	8	2	5	20	11	2	33
84	9	5	6	4	6	4	4	9	9	1	9	26	18	1	45
85	9	6	7	3	7	3	1	2	2	8	2	22	4	8	34
86	6	9	3	7	3	7	2	6	10	0	1	31	7	0	38
87	10	4	7	3	9	1	1	10	9	1	9	19	19	1	39
88	9	8	6	4	6	4	2	2	2	8	7	27	9	8	44
89	9	8	5	5	5	5	5	6	6	4	7	32	13	4	49
90	5	2	5	5	5	5	3	3	3	7	3	20	6	7	33
91	5	5	5	5	5	5	4	2	2	8	2	24	4	8	36
92	4	5	5	5	5	5	4	3	3	7	8	23	11	7	41
93	5	4	7	3	7	3	3	9	2	8	5	18	14	8	40
94	9	9	3	7	6	4	4	8	8	2	10	33	18	2	53
95	6	7	8	2	8	2	4	5	9	1	5	21	10	1	32
96	9	7	8	2	8	2	5	7	6	4	6	25	13	4	42
97	8	5	8	2	8	2	2	6	5	5	7	19	13	5	37
98	7	3	8	2	8	2	2	6	9	1	2	16	8	1	25
99	4	8	7	3	8	2	1	5	9	1	2	18	7	1	26
100	6	6	9	1	10	0	1	1	7	3	4	14	5	3	22
101	3	5	8	2	8	2	3	1	1	9	3	15	4	9	28
102	7	5	5	5	5	5	1	9	9	1	7	23	16	1	40
103	7	7	8	2	8	2	2	1	5	5	5	20	6	5	31
104	7	7	5	5	5	5	1	7	9	1	9	25	16	1	42
105	10	9	9	1	9	1	2	10	2	8	9	23	19	8	50
106	3	3	9	1	9	1	1	2	8	2	2	9	4	2	15
107	6	2	9	1	9	1	1	1	9	1	4	11	5	1	17
108	10	1	10	0	10	0	3	5	9	1	1	14	6	1	21
109	7	9	8	2	8	2	2	7	8	2	6	22	13	2	37
110	4	5	7	3	7	3	3	1	3	7	7	18	8	7	33
111	9	2	8	2	10	0	1	1	8	2	4	14	5	2	21
112	9	3	9	1	9	1	2	3	9	1	4	16	7	1	24
113	8	6	9	1	10	0	6	7	6	4	5	21	12	4	37
114	7	9	9	1	10	0	2	4	5	5	5	19	9	5	33
115	10	10	7	3	9	1	4	9	2	8	3	28	12	8	48
116	3	5	9	1	9	1	3	8	8	2	2	13	10	2	25
117	8	1	10	0	10	0	4	4	9	1	3	13	7	1	21
118	9	9	8	2	8	2	6	2	8	2	3	28	5	2	35
119	5	4	9	1	9	1	2	9	9	1	5	13	14	1	28
120	7	7	9	1	9	1	2	6	9	1	4	18	10	1	29
121	8	8	8	2	8	2	5	7	2	8	8	25	15	8	48
122	4	4	8	2	8	2	4	2	9	1	7	16	9	1	26
123	9	8	9	1	9	1	6	7	5	5	3	25	10	5	40
124	9	7	9	1	9	1	2	5	7	3	5	20	10	3	33
125	5	3	10	0	10	0	3	2	9	1	3	11	5	1	17
126	6	9	5	5	5	5	3	5	7	3	3	28	8	3	39
127	3	5	5	5	5	5	5	3	9	1	3	23	6	1	30
128	9	5	8	2	8	2	3	8	5	5	9	21	17	5	43
129	9	6	8	2	8	2	4	6	9	1	5	23	11	1	35
130	2	5	7	3	7	3	5	5	8	2	3	18	8	2	28
131	9	9	8	2	8	2	2	8	4	6	10	24	18	6	48
132	3	4	7	3	9	1	2	2	7	3	2	13	4	3	20
133	2	5	8	2	10	0	1	5	9	1	2	10	7	1	18
134	9	6	8	2	8	2	4	9	6	4	9	23	18	4	45
135	3	6	9	1	9	1	2	2	9	1	3	13	5	1	19
136	2	4	10	0	9	1	2	2	8	2	2	9	4	2	15
137	10	5	5	5	5	5	3	8	8	2	8	28	16	2	46
138	9	5	8	2	8	2	3	5	7	3	9	21	14	3	38
139	8	5	9	1	9	1	4	2	9	1	4	19	6	1	26
140	9	7	4	6	5	5	4	9	1	9	10	31	19	9	59
141	8	0	8	2	9	1	3	2	8	2	5	14	7	2	23
142	3	5	7	3	9	1	2	2	5	5	3	14	5	5	24
143	3	0	10	0	9	1	1	2	10	0	2	5	4	0	9
144	2	1	10	0	9	1	4	2	9	1	2	8	4	1	13
145	7	4	5	5	3	7	3	2	5	5	4	26	6	5	37
146	6	3	5	5	5	5	6	3	3	7	4	25	7	7	39
147	7	6	5	5	5	5	4	1	3	7	6	27	7	7	41
148	2	7	8	2	8	2	3	2	5	5	2	16	4	5	25
149	8	7	8	2	5	5	1	2	3	7	7	23	9	7	39
150	4	3	9	1	9	1	2	2	5	5	2	11	4	5	20
151	5	8	9	1	9	1	5	7	8	2	6	20	13	2	35
152	5	6	7	3	7	3	0	2	4	6	2	17	4	6	27
153	5	7	8	2	8	2	1	2	6	4	6	17	8	4	29
154	8	8	7	3	7	3	2	4	5	5	7	24	11	5	40
155	5	4	9	1	9	1	2	3	3	7	4	13	7	7	27
156	4	4	9	1	7	3	2	5	2	8	3	14	8	8	30
157	6	5	9	1	8	2	4	2	3	7	8	18	10	7	35

## Sheet: SSRS
No.	1	2	3	4	5	6	7	8	9	10	Objective social support	Subjective social support	Social support utilization	Total score
1	4	2	4	4	8	7	7	1	3	3	16	20	7	43
2	2	4	3	0	12	1	3	2	2	1	8	17	5	30
3	3	4	4	0	4	1	3	2	2	1	8	11	5	24
4	1	4	3	0	4	0	2	2	1	2	6	8	5	19
5	4	4	4	4	8	1	4	2	2	1	9	20	5	34
6	4	4	1	2	4	3	3	2	2	1	10	11	5	26
7	3	4	4	4	12	1	4	3	2	1	9	23	6	38
8	4	4	4	4	19	0	4	1	1	1	8	31	3	42
9	2	4	3	0	12	1	2	1	1	1	7	17	3	27
10	1	4	3	0	4	0	1	1	1	1	5	8	3	16
11	2	4	2	0	12	0	3	2	1	1	7	16	4	27
12	3	4	4	0	12	1	4	2	3	1	9	19	6	34
13	3	4	3	3	8	3	1	1	1	1	8	17	3	28
14	2	4	2	3	8	1	2	2	2	4	7	15	8	30
15	2	4	4	0	4	1	2	1	1	1	7	10	3	20
16	4	4	3	2	4	0	2	1	1	1	6	13	3	22
17	3	4	4	0	4	1	1	1	1	1	6	11	3	20
18	3	4	3	2	4	0	2	4	4	1	6	12	9	27
19	2	4	1	0	7	1	2	2	2	1	7	10	5	22
20	4	4	3	0	8	0	2	3	2	1	6	15	6	27
21	1	1	1	1	3	0	2	1	1	1	3	6	3	12
22	2	4	3	4	6	0	5	1	1	1	9	15	3	27
23	4	4	3	3	4	0	5	4	4	1	9	14	9	32
24	1	4	4	0	4	1	3	1	1	1	8	9	3	20
25	2	4	3	0	4	3	4	4	4	1	11	9	9	29
26	4	1	3	3	4	0	4	2	3	1	5	14	6	25
27	2	4	3	0	4	2	4	1	1	1	10	9	3	22
28	4	4	3	0	8	3	4	2	2	1	11	15	5	31
29	2	4	4	0	8	0	2	3	3	1	6	14	7	27
30	2	1	3	2	4	1	3	1	1	1	5	11	3	19
31	2	1	2	2	0	1	3	4	3	1	5	6	8	19
32	4	1	4	4	11	0	4	2	3	1	5	23	6	34
33	3	4	4	4	8	1	4	4	4	1	9	19	9	37
34	1	4	2	3	8	1	4	2	1	1	9	14	4	27
35	4	1	4	0	12	1	3	2	1	1	5	20	4	29
36	3	4	3	3	8	0	4	2	1	1	8	17	4	29
37	4	4	3	0	8	1	4	3	3	1	9	15	7	31
38	3	1	4	0	12	1	3	1	1	1	5	19	3	27
39	4	4	4	0	8	2	4	4	4	2	10	16	10	36
40	4	4	3	0	7	1	4	3	3	1	9	14	7	30
41	2	4	2	2	4	0	4	1	1	1	8	10	3	21
42	3	4	4	0	7	1	3	4	4	1	8	14	9	31
43	1	4	2	0	16	3	3	1	1	1	10	19	3	32
44	2	4	4	4	5	1	2	2	3	1	7	15	6	28
45	2	4	2	0	4	0	3	1	1	1	7	8	3	18
46	1	4	2	2	8	1	2	1	1	1	7	13	3	23
47	4	4	4	4	8	2	4	1	1	1	10	20	3	33
48	4	4	4	4	16	2	6	4	4	3	12	28	11	51
49	3	4	4	0	4	1	3	2	2	1	8	11	5	24
50	3	4	4	0	8	1	4	4	3	1	9	15	8	32
51	3	4	4	4	7	0	5	4	3	1	9	18	8	35
52	4	4	4	4	7	0	4	4	4	2	8	19	10	37
53	3	4	4	0	4	1	4	2	1	1	9	11	4	24
54	3	4	3	4	10	1	5	4	4	1	10	20	9	39
55	2	4	4	0	4	1	3	2	2	1	8	10	5	23
56	4	4	4	4	8	1	5	4	4	5	10	20	13	43
57	4	4	4	0	8	1	4	1	1	2	9	16	4	29
58	2	4	3	4	8	2	4	2	3	1	10	17	6	33
59	4	4	4	0	7	2	4	2	3	1	10	15	6	31
60	2	4	4	0	7	1	4	4	3	1	9	13	8	30
61	2	4	3	4	4	1	3	2	1	1	8	13	4	25
62	3	4	4	0	10	2	4	4	4	1	10	17	9	36
63	3	4	3	0	8	2	4	2	3	1	10	14	6	30
64	4	4	4	4	8	0	3	4	4	1	7	20	9	36
65	2	1	2	2	8	1	3	2	3	1	5	14	6	25
66	4	4	4	0	8	1	4	4	4	1	9	16	9	34
67	3	4	4	0	7	1	4	2	3	1	9	14	6	29
68	4	4	4	4	8	0	5	4	4	1	9	20	9	38
69	2	4	4	3	8	1	4	4	4	1	9	17	9	35
70	2	4	4	4	8	0	4	3	3	1	8	18	7	33
71	4	4	4	0	7	1	3	4	4	1	8	15	9	32
72	3	4	3	0	8	0	2	1	1	1	6	14	3	23
73	4	4	4	0	8	1	3	4	4	1	8	16	9	33
74	2	4	3	0	7	1	3	3	3	1	8	12	7	27
75	2	4	2	0	8	4	2	4	4	1	10	12	9	31
76	2	4	3	0	7	1	4	1	1	1	9	12	3	24
77	3	4	4	0	12	2	4	3	4	1	10	19	8	37
78	4	4	4	4	8	0	4	4	4	3	8	20	11	39
79	2	4	3	0	4	1	3	3	2	1	8	9	6	23
80	2	4	4	0	6	1	3	4	4	1	8	12	9	29
81	2	4	3	3	4	1	3	3	3	1	8	12	7	27
82	2	4	4	0	8	2	4	2	2	1	10	14	5	29
83	2	4	3	4	8	1	4	2	1	1	9	17	4	30
84	2	4	3	3	7	2	2	3	3	1	8	15	7	30
85	3	4	4	0	7	2	4	4	4	1	10	14	9	33
86	4	4	3	4	7	2	5	2	3	1	11	18	6	35
87	3	4	2	2	4	0	2	1	1	1	6	11	3	20
88	3	4	4	0	7	1	3	4	4	1	8	14	9	31
89	2	4	3	2	2	0	2	2	2	1	6	9	5	20
90	3	4	3	2	8	1	2	1	1	1	7	16	3	26
91	4	4	4	0	8	2	4	1	1	1	10	16	3	29
92	3	4	4	0	8	2	3	1	1	1	9	15	3	27
93	2	4	4	3	16	4	4	4	3	1	12	25	8	45
94	3	4	1	0	4	1	1	1	1	1	6	8	3	17
95	3	4	3	0	8	2	4	4	4	1	10	14	9	33
96	2	4	3	0	8	2	4	1	1	1	10	13	3	26
97	2	4	4	0	8	2	3	3	3	1	9	14	7	30
98	4	4	4	0	7	2	4	4	4	2	10	15	10	35
99	3	4	2	3	6	0	6	2	3	1	10	14	6	30
100	3	4	4	0	8	2	4	4	3	1	10	15	8	33
101	1	4	4	0	11	2	3	3	4	1	9	16	8	33
102	2	4	4	1	8	3	4	2	4	1	11	15	7	33
103	2	4	4	0	8	2	3	3	3	1	9	14	7	30
104	2	4	2	4	12	2	5	1	1	1	11	20	3	34
105	3	4	2	0	10	1	4	4	4	1	9	15	9	33
106	3	4	4	0	12	1	4	4	4	1	9	19	9	37
107	3	4	3	0	8	2	4	3	3	1	10	14	7	31
108	4	4	4	0	13	2	4	4	4	4	10	21	12	43
109	1	4	4	0	8	2	3	3	3	1	9	13	7	29
110	2	4	3	0	7	1	4	1	1	1	9	12	3	24
111	3	4	3	0	11	1	4	4	4	3	9	17	11	37
112	2	4	4	0	10	1	3	2	2	1	8	16	5	29
113	2	4	2	0	11	1	3	3	2	1	8	15	6	29
114	2	4	4	0	13	1	4	3	3	2	9	19	8	36
115	2	4	4	0	8	1	3	2	2	1	8	14	5	27
116	3	4	4	4	12	2	6	3	3	1	12	23	7	42
117	2	4	2	4	16	2	5	3	3	3	11	24	9	44
118	1	4	2	0	4	1	2	2	1	1	7	7	4	18
119	4	4	4	0	12	2	4	4	4	3	10	20	11	41
120	3	4	4	0	10	1	3	3	3	1	8	17	7	32
121	3	4	3	0	7	1	4	2	2	1	9	13	5	27
122	2	4	3	0	3	1	3	2	2	4	8	8	8	24
123	2	4	4	0	4	1	3	3	3	1	8	10	7	25
124	3	4	4	0	12	2	2	2	3	1	8	19	6	33
125	4	4	4	0	12	2	4	4	4	2	10	20	10	40
126	2	4	2	0	4	0	1	1	1	1	5	8	3	16
127	4	4	4	0	12	2	4	2	2	3	10	20	7	37
128	3	4	4	0	12	2	4	3	3	3	10	19	9	38
129	3	4	4	4	12	2	5	3	3	2	11	23	8	42
130	2	4	4	2	8	1	3	2	2	1	8	16	5	29
131	1	4	1	0	8	1	3	1	1	1	8	10	3	21
132	3	4	4	4	12	2	4	2	2	4	10	23	8	41
133	4	4	4	0	8	3	4	4	4	4	11	16	12	39
134	4	4	4	0	8	1	2	4	3	1	7	16	8	31
135	1	4	3	0	12	1	2	1	1	1	7	16	3	26
136	3	4	4	0	12	2	4	4	3	3	10	19	10	39
137	2	4	2	3	8	2	2	1	1	1	8	15	3	26
138	3	4	4	0	8	1	4	4	4	3	9	15	11	35
139	4	4	4	3	12	2	6	4	4	4	12	23	12	47
140	3	4	4	0	8	1	3	3	3	3	8	15	9	32
141	4	4	4	0	12	2	4	2	3	3	10	20	8	38
142	2	4	4	0	12	2	4	2	3	3	10	18	8	36
143	4	4	4	0	12	1	3	4	4	4	8	20	12	40
144	4	4	4	4	8	2	5	2	3	3	11	20	8	39
145	3	4	4	0	8	2	3	3	3	3	9	15	9	33
146	2	4	3	0	12	1	3	2	2	2	8	17	6	31
147	2	4	2	0	4	1	3	2	2	3	8	8	7	23
148	2	4	3	0	4	1	3	3	3	2	8	9	8	25
149	3	4	3	0	8	2	3	1	1	1	9	14	3	26
150	4	4	4	0	12	3	4	4	4	2	11	20	10	41
151	2	4	3	2	8	2	3	2	1	2	9	15	5	29
152	3	4	4	0	8	2	3	4	4	4	9	15	12	36
153	4	4	4	4	14	2	4	4	4	2	10	26	10	46
154	2	4	4	0	8	1	3	2	2	1	8	14	5	27
155	4	4	4	0	16	2	4	4	4	3	10	24	11	45
156	3	4	4	0	8	2	3	4	4	4	9	15	12	36
157	3	4	1	0	12	1	2	2	3	3	7	16	8	31

## Sheet: BIBCQ
No.	1	2	3	4	5	6	7	8	9	10	11	12	13	14	15	16	17	18	19	20	21	22	23	24	25	26	27	28	29	30	31	32	33	34	35	36	37	38	39	40	41	42	43	44	45	46	47	48	49
1	2	4	2	1	4	4	1	2	1	5	4	4	4	5	1	4	4	2	4	4	1	1	5	4					3	1	1	1	1	3	2	1	1	1	1	1	1	2	3	1	1	5	5	1	3
2	4	2	5	1	4	4	1	4	4	1	4	1	1	4	1	3	5	4	5	1	4	1	1	1					2	4	2	5	4	1	2	4	2	5	2	4	1	4	2	5	5	4	1	2	4
3	5	4	5	1	2	3	2	4	3	4	4	1	3	4	2	4	5	5	5	4	4	2	4	1					4	4	4	5	2	5	1	4	2	1	2	4	1	4	2	5	5	4	5	1	5
4	4	4	5	1	5	2	4	1	3	4	4	1	4	4	4	3	4	4	5	2	2	1	2	1					1	2	1	4	4	1	5	3	1	1	5	1	2	5	1	5	5	4	1	5	3
5	4	5	1	1	4	4	1	1	5	4	4	1	4	1	4	3	5	4	1	4	3	2	4	5					1	3	2	2	4	5	4	4	2	1	4	3	4	4	4	4	5	5	4	4	4
6	5	2	5	1	3	4	4	4	3	4	4	3	1	4	4	4	4	1	1	4	2	1	4	5					1	2	1	1	1	2	4	4	2	1	1	3	4	2	5	4	4	4	4	2	4
7	2	3	1	1	4	5	1	2	4	5	4	1	1	5	1	4	4	2	1	4	4	2	4		5	5	5	2	2	4	2	4	1	1	2	2	4	4	4	2	1	2	5	5	4	4	1	2	4
8	2	5	5	1	5	5	2	4	4	4	4	4	1	6	1	4	5	1	1	4	1	1	4	5					5	1	5	2	5	2	2	4	4	1	4	2	1	3	5	5	4	4	1	2	5
9	4	2	2	2	5	4	4	4	4	4	4	2	4	4	4	4	5	4	2	4	4	2	4	4					2	3	2	4	5	4	5	2	0	2	4	0	1	2	5	4	4	4	1	4	5
10	4	4	2	1	5	2	5	4	1	4	4	1	3	4	1	4	4	2	2	4	2	1	4	4					2	5	1	4	5	4	5	2	0	1	4	0	1	4	5	5	4	4	1	2	4
11	5	4	5	1	2	5	2	4	4	4	4	1	3	4	1	4	4	3	5	4	5	2	4	1					2	5	2	5	5	4	4	2	0	1	2	0	1	4	4	3	4	3	4	4	4
12	1	5	2	1	1	5	2	4	2	4	4	5	2	4	1	4	4	1	1	4	1	1	4	5					2	2	2	1	2	4	2	2	1	1	2	1	1	4	5	3	2	1	2	3	5
13	4	5	2	1	1	4	2	3	2	4	4	2	2	5	1	4	5	4	1	4	2	2	4		5	5	5	1	5	2	2	5	2	2	2	4	5	2	3	4	1	3	4	4	4	2	1	2	4
14	5	2	2	1	1	4	4	4	2	2	4	1	1	4	4	3	2	4	1	4	1	1	4		5	5	5	1	2	2	2	5	5	2	4	4	4	1	4	1	1	4	5	5	3	1	2	2	4
15	1	3	1	1	2	4	3	4	2	4	4	5	2	4	2	4	4	1	1	4	3	2	4	5					2	3	2	1	2	4	2	3	2	4	3	0	1	3	4	5	2	2	1	2	4
16	4	4	2	1	2	4	4	2	4	3	3	1	2	4	2	3	4	4	1	4	3	2	4	4					2	3	2	5	4	1	4	5	0	1	4	0	4	4	5	5	4	4	1	2	4
17	4	4	1	1	2	4	5	1	4	2	2	1	4	4	3	2	4	3	1	4	5	1	4	5					3	4	5	4	5	4	5	2	4	1	4	1	3	4	5	4	2	5	1	5	3
18	1	4	1	1	4	4	4	4	1	4	4	4	2	5	2	5	4	2	1	4	2	2	4	5					1	2	1	1	4	2	4	3	2	1	4	0	1	4	4	5	4	1	1	5	4
19	2	4	2	1	2	5	3	4	2	4	4	4	3	4	2	4	4	1	2	4	3	2	4	5					2	2	1	2	2	1	3	3	0	1	1	0	1	2	5	4	4	4	1	4	4
20	4	3	2	1	2	4	3	2	4	3	4	5	3	4	3	3	4	1	1	4	3	2	4	5					1	2	2	2	4	4	4	3	0	1	3	0	3	4	4	4	4	4	4	4	4
21	4	5	2	1	3	4	5	4	4	4	4	1	4	3	4	4	4	3	1	4	2	2	4	5					1	2	2	5	4	4	5	3	4	1	4	1	2	4	4	4	3	4	1	2	5
22	3	4	4	1	5	5	2	4	2	4	4	3	2	5	4	4	5	4	1	3	3	1	3	4					5	3	2	2	2	4	2	3	4	1	2	3	1	2	5	2	2	4	1	1	4
23	2	3	5	1	4	4	2	3	2	4	4	5	2	4	1	4	4	2	1	4	1	4	4	3					2	1	1	1	4	2	1	2	5	1	3	1	2	2	4	4	3	4	1	2	4
24	5	4	5	2	4	4	5	4	4	4	3	1	3	4	4	4	4	5	1	5	3	2	3	1					5	3	2	5	4	5	4	2	1	1	4	3	4	5	5	4	2	3	4	4	4
25	1	4	2	3	2	4	4	2	4	4	4	5	2	4	3	4	5	1	1	4	1	5	4		4	4	4	1	5	1	2	1	4	4	4	2	0	1	4	0	4	3	5	5	4	4	1	2	4
26	1	2	1	3	4	4	2	4	4	3	4	5	2	4	4	4	5	1	1	4	2	4	4	5					5	1	2	1	4	5	4	1	2	4	4	3	4	1	5	1	4	5	1	4	5
27	5	2	3	4	4	4	5	4	4	4	4	1	2	4	5	4	5	4	2	4	3	2	4	4					5	2	4	5	5	4	5	4	0	1	4	0	5	4	3	5	5	5	1	4	4
28	1	5	1	1	4	4	3	4	2	3	4	5	3	4	5	4	4	1	1	4	1	2	4	5					5	1	1	1	4	5	4	3	0	1	4	0	5	2	5	2	5	5	2	3	5
29	1	4	2	1	1	4	1	4	4	4	3	5	1	5	1	3	4	1	1	4	1	1	4	5					1	1	1	1	1	2	1	1	0	1	3	0	1	2	5	4	2	3	1	4	4
30	4	4	1	1	2	4	3	2	4	3	3	1	1	4	3	3	4	4	1	4	1	1	4	5					1	1	4	4	1	1	2	3	0	1	2	0	3	1	5	3	4	5	1	4	5
31	5	4	2	1	2	3	4	5	1	2	3	1	2	4	4	3	5	4	1	4	1	1	4	5					3	1	3	5	5	4	4	2	0	1	4	0	5	4	5	2	4	5	1	4	5
32	5	4	2	1	1	4	2	2	5	4	3	1	2	4	4	3	5	4	1	4	1	1	4	5					2	2	2	5	3	1	1	2	3	1	4	4	1	2	5	3	5	5	1	1	5
33	1	4	1	1	5	5	2	5	1	5	5	5	2	5	1	5	4	1	1	4	1	1	5	5					1	1	1	1	1	2	1	1	5	1	1	1	1	2	5	4	2	2	1	1	5
34	4	4	2	1	2	5	4	4	4	3	4	2	2	5	1	3	5	4	1	4	1	1	4	4					2	2	1	4	4	4	5	1	0	1	4	0	1	4	5	2	1	4	1	1	4
35	4	4	2	1	2	5	4	2	4	3	4	1	4	4	1	4	5	4	1	4	2	1	4	4					2	2	4	4	4	2	4	2	4	1	3	2	1	4	4	5	4	5	1	2	5
36	2	2	1	1	2	4	3	5	2	4	4	1	2	4	1	5	4	1	1	4	1	2	4	5					2	1	1	1	4	5	4	1	3	5	4	3	2	4	5	1	2	5	4	1	4
37	1	4	2	1	1	4	1	4	4	4	4	4	2	4	1	4	4	1	1	3	1	1	3	4					1	2	2	2	4	3	1	1	0	1	4	0	1	3	4	1	5	5	1	5	5
38	1	2	4	1	2	2	2	2	4	3	3	2	2	4	1	4	4	2	5	3	1	1	3	2					1	2	1	3	1	2	2	4	0	4	2	0	4	4	5	4	4	5	3	1	4
39	1	2	1	1	4	2	1	3	4	3	4	4	2	4	2	4	4	1	1	3	1	1	3	5					1	1	1	2	2	1	2	2	0	1	3	0	1	2	4	3	2	4	1	2	5
40	4	5	4	1	2	4	1	4	3	4	4	2	1	4	3	4	5	3	4	3	2	1	3	3					1	2	2	4	2	2	1	2	0	1	2	0	1	2	5	2	4	4	1	4	4
41	4	2	1	2	4	2	5	4	4	4	4	1	4	4	5	4	5	5	1	4	1	1	4	5					5	1	5	5	5	5	5	5	2	4	5	2	5	5	4	5	5	5	4	4	4
42	1	4	2	1	4	3	4	3	4	4	4	3	2	4	2	3	5	1	1	4	4	1	4	5					5	4	2	1	2	2	1	2	2	1	2	2	3	4	4	5	4	5	1	4	5
43	1	2	2	1	4	4	1	4	3	3	3	4	1	5	2	4	4	2	1	4	3	2	4	5					2	3	2	2	1	1	2	2	0	1	3	0	1	1	4	5	2	3	4	1	5
44	4	2	2	4	2	4	4	4	3	4	4	4	5	2	4	4	4	2	2	4	1	4	4	4					2	1	1	2	5	3	5	4	0	1	4	0	5	4	5	5	4	2	1	4	2
45	4	4	1	1	4	4	3	2	4	3	3	1	2	4	4	3	3	5	1	4	1	1	4	4					2	2	3	5	4	4	4	2	0	1	5	0	2	4	4	2	4	5	1	5	4
46	2	4	1	3	4	4	3	3	2	3	4	3	4	4	2	4	1	2	1	4	1	1	4	5					1	1	2	2	5	4	4	2	2	1	5	3	5	5	4	2	2	4	1	5	4
47	4	3	2	1	4	4	2	2	5	4	4	1	1	4	3	4	5	4	1	2	3	1	2	5					3	2	3	5	3	2	2	2	2	1	3	4	3	2	5	5	4	4	1	2	4
48	1	4	1	1	2	4	1	4	2	5	5	4	1	4	1	5	4	1	1	4	1	1	4		5	5	5	1	1	1	1	1	2	1	2	2	5	1	2	2	1	2	5	1	1	1	1	1	4
49	4	3	2	1	2	4	1	4	4	3	3	2	3	4	4	3	5	4	1	4	2	1	4	4					2	1	4	4	4	2	1	1	4	1	2	3	4	1	4	2	4	4	1	1	5
50	1	4	1	1	1	5	1	3	2	4	4	5	1	5	1	4	5	1	1	3	1	1	3	5					2	1	1	1	1	2	1	1	5	1	2	2	3	2	5	4	3	4	2	1	4
51	1	5	1	1	1	4	4	4	2	4	4	4	1	4	4	4	5	2	1	4	2	1	4	5					2	1	1	2	4	4	4	2	4	1	5	2	1	4	5	1	4	3	1	5	4
52	3	2	1	1	1	4	2	2	4	3	2	2	1	4	2	4	5	4	1	4	1	1	4	5					3	2	3	3	2	2	1	3	4	4	4	4	3	1	3	2	4	5	3	1	4
53	3	2	1	1	2	4	1	4	4	4	4	1	2	4	4	3	5	2	1	3	1	3	3	5					4	1	1	4	4	3	4	2	0	2	4	0	3	2	3	4	4	5	5	4	4
54	2	2	2	1	1	5	4	4	2	4	4	5	4	3	2	4	4	1	1	4	1	2	4	4					1	1	1	1	4	4	4	2	4	4	5	2	5	4	4	1	3	4	4	5	4
55	4	2	1	1	4	2	1	3	3	3	2	1	4	4	4	3	5	4	1	4	5	2	4	5					1	2	4	4	4	5	3	4	0	4	4	0	3	1	4	4	4	5	3	2	4
56	1	5	1	1	1	5	2	4	1	5	5	5	3	5	1	5	3	2	1	5	1	1	5		4	4	3	1	1	1	1	1	2	2	2	2	0	1	3	0	2	2	5	3	2	1	1	2	5
57	4	4	1	1	3	3	4	1	4	2	2	2	4	4	3	2	4	4	1	2	1	1	3	4					4	2	2	4	5	4	4	2	0	1	4	0	5	3	4	5	3	4	1	4	4
58	2	5	1	1	2	4	4	4	3	4	4	2	2	5	2	4	4	1	1	4	1	1	4		5	5	5	1	2	1	2	1	5	5	5	2	4	1	5	2	1	5	5	3	3	5	1	5	4
59	4	3	4	1	1	4	4	2	5	2	2	1	2	4	4	3	4	4	4	3	1	1	3	2					1	2	1	5	5	5	3	2	2	1	5	5	4	4	3	1	3	5	2	4	5
60	4	1	5	1	2	4	4	4	4	4	4	2	3	3	4	2	3	3	5	4	1	1	4	1					3	1	4	5	2	2	3	2	0	4	3	0	4	4	4	5	5	5	4	2	5
61	3	1	5	1	2	4	3	3	2	4	4	2	3	3	2	4	5	3	4	4	1	1	4	1					4	2	3	4	4	4	4	2	3	4	4	4	2	4	4	1	3	5	5	2	5
62	2	2	1	1	1	4	2	3	2	3	3	3	2	4	2	4	4	2	1	4	1	2	4	4					1	1	1	2	3	2	3	2	2	1	4	3	1	2	5	4	3	4	3	1	5
63	3	1	1	1	2	4	1	4	1	4	4	1	4	4	1	4	4	3	1	4	1	2	4		5	5	5	1	2	2	2	4	1	2	2	1	3	1	1	4	1	2	5	2	3	2	5	1	5
64	1	4	2	1	2	4	4	4	2	4	4	4	3	4	2	4	5	1	1	3	1	2	3	5					1	1	2	1	3	2	4	2	0	1	3	0	3	2	5	2	4	5	1	2	5
65	3	4	4	1	3	4	1	4	3	4	4	1	1	4	4	4	4	4	4	3	1	2	3	2					1	1	2	4	2	1	2	4	0	1	2	0	5	1	5	4	4	4	1	2	5
66	2	5	1	1	1	5	1	4	1	4	5	5	1	4	3	5	4	1	2	3	1	1	3	4					1	1	1	1	1	2	2	2	0	1	1	0	5	5	5	2	4	3	1	1	5
67	4	4	5	1	2	4	3	2	4	3	3	1	2	4	3	4	4	4	4	3	1	1	3	2					2	1	1	5	4	4	4	2	0	1	4	0	1	5	5	2	4	4	1	4	4
68	1	5	2	1	2	4	2	5	1	4	4	2	2	5	3	4	4	1	1	4	1	1	4	4					1	1	1	1	1	2	1	2	0	1	2	0	4	2	5	4	2	3	1	1	4
69	5	5	5	1	1	4	4	3	4	4	4	1	4	4	3	4	5	4	5	3	1	1	3	1					2	1	3	4	5	2	4	2	0	1	5	0	2	3	5	3	3	4	1	4	4
70	4	4	4	1	2	4	1	2	4	3	4	1	2	4	3	4	4	2	4	3	4	2	3	2					2	4	1	4	2	2	3	2	2	1	3	3	1	2	5	2	4	4	1	2	4
71	4	5	4	1	2	4	2	4	4	4	4	1	1	4	1	4	4	4	5	3	1	2	3	2					2	1	3	4	1	2	4	3	0	1	4	0	2	2	5	2	4	5	1	2	5
72	1	5	2	1	2	4	2	4	2	3	4	4	2	4	4	3	4	1	2	3	3	2	3	4					1	3	2	1	2	2	2	1	0	1	2	0	4	2	5	1	3	4	1	1	4
73	4	4	2	1	2	4	4	3	4	4	4	1	2	4	2	4	4	4	1	3	1	1	3	4					3	1	2	4	4	1	4	4	0	1	4	0	2	4	5	2	3	4	2	4	4
74	3	4	2	1	1	5	4	3	5	4	4	1	2	4	3	3	4	4	2	4	1	2	4	4					2	1	1	5	5	2	4	1	4	1	4	4	3	4	4	1	3	4	2	1	4
75	1	5	1	1	1	5	1	4	2	4	4	4	1	4	2	4	4	1	1	4	1	1	4		5	5	5	1	1	1	1	1	2	2	2	1	4	1	1	2	1	2	5	1	4	1	1	2	5
76	1	2	1	1	1	5	4	4	2	3	4	3	5	2	4	3	4	2	2	3	1	2	3	4					2	2	2	2	4	4	5	2	0	1	5	0	5	4	5	1	3	3	1	1	4
77	1	5	1	1	2	4	2	3	3	3	3	4	1	4	2	3	4	1	1	3	1	2	3		4	4	4	1	1	1	1	1	1	1	2	2	0	1	1	0	1	2	5	2	4	1	2	2	4
78	2	4	1	1	2	5	3	4	2	4	4	1	1	2	2	4	1	2	2	4	1	1	4	4					2	1	1	2	3	2	2	2	4	1	3	2	4	2	5	5	3	3	1	1	5
79	2	4	2	2	5	2	4	2	4	3	3	2	1	3	3	3	4	2	2	3	4	2	3	4					2	2	3	3	4	2	3	5	0	1	4	0	1	2	1	4	4	4	1	2	4
80	1	1	1	1	4	2	2	2	2	3	3	2	4	3	3	4	2	4	1	4	1	4	1	4					1	1	1	3	1	2	3	4	0	2	2	0	3	2	2	4	5	3	3	1	2
81	4	4	5	5	1	2	4	4	4	2	3	1	4	4	4	3	4	4	5	4	1	2	4	1					4	2	4	4	5	3	5	1	0	1	5	0	5	4	5	4	4	4	1	5	4
82	3	2	4	1	1	4	2	2	4	4	4	1	2	4	2	4	4	4	4	3	1	2	1	2					1	1	1	3	1	1	2	2	0	2	1	0	2	1	4	4	3	3	1	2	4
83	2	5	1	1	1	5	2	5	2	4	4	4	2	4	1	4	4	2	1	4	1	2	4		5	5	5	1	1	1	1	2	1	2	2	2	5	1	3	1	3	2	5	3	3	1	1	2	5
84	4	2	2	1	1	4	3	2	4	2	2	1	3	4	4	2	5	4	2	2	2	2	2	4					1	1	2	4	4	3	4	1	0	1	4	0	4	4	4	2	4	4	2	4	4
85	2	4	4	1	1	4	1	4	2	4	4	2	2	4	2	4	4	2	4	3	2	2	3	1					2	2	2	2	1	2	1	1	0	4	1	0	1	1	5	2	3	3	1	1	4
86	4	2	2	1	1	5	2	2	5	4	4	1	1	3	2	4	4	4	1	4	1	1	4	4					2	1	3	4	3	2	2	1	2	4	3	4	1	2	5	1	3	5	1	1	4
87	5	4	3	1	1	4	3	1	4	2	2	1	3	4	3	2	5	4	3	2	2	2	2	2					3	2	4	5	3	3	4	2	4	1	4	4	4	4	5	2	4	5	1	4	4
88	2	4	2	1	2	4	2	3	2	4	4	2	2	4	2	4	4	2	2	3	1	2	3	4					1	1	1	1	2	1	2	2	0	1	2	0	4	2	5	4	4	2	1	1	4
89	3	1	2	1	4	4	3	2	4	3	3	2	2	4	4	2	4	4	1	4	2	2	3	4					3	2	3	3	3	2	4	2	1	3	4	5	4	2	4	3	4	4	3	4	4
90	3	3	1	1	3	4	3	4	2	4	4	2	2	4	3	4	4	2	2	4	2	2	4	4					2	2	2	4	3	2	2	4	2	1	4	2	3	2	5	4	4	4	2	2	4
91	1	2	2	1	1	4	1	3	2	3	3	5	2	4	1	3	4	1	1	4	2	2	4	4					1	1	1	1	2	2	2	4	0	1	2	0	5	2	5	3	4	3	1	2	4
92	1	4	1	1	3	3	2	4	2	4	4	4	1	4	2	3	4	1	1	3	1	2	3	5					2	1	3	1	2	2	2	4	0	1	3	0	3	1	2	3	4	3	1	3	3
93	1	2	2	1	2	4	2	4	2	3	3	4	2	3	2	4	3	1	1	3	1	1	3	4					1	1	1	1	2	3	2	3	0	2	2	0	4	2	2	3	4	3	5	1	4
94	4	2	5	5	2	4	4	2	5	2	2	2	4	3	4	1	4	5	5	2	1	4	1	1					3	1	3	4	4	1	4	2	2	4	4	3	2	4	2	4	4	5	3	5	2
95	4	2	2	1	2	4	4	2	4	2	2	1	4	4	4	2	2	4	1	4	1	2	4	4					1	1	1	5	3	2	3	2	4	1	4	3	1	2	4	4	3	4	2	2	4
96	4	2	4	2	2	4	2	2	4	2	3	1	4	4	4	3	4	5	3	4	1	2	4	4					1	1	1	4	4	4	3	4	4	2	4	2	3	3	3	1	3	4	3	4	4
97	3	2	5	1	2	4	2	4	3	3	3	2	4	4	3	3	4	4	5	3	1	2	3	1					1	1	3	4	3	1	2	2	2	2	4	3	2	2	3	4	4	4	3	2	4
98	1	5	1	2	2	4	3	4	2	4	4	2	2	4	2	4	3	3	4	3	1	2	3	4					2	1	2	4	4	1	2	2	0	1	4	0	1	2	4	2	3	4	1	1	5
99	2	2	1	1	2	4	4	5	2	4	4	4	2	4	2	4	2	2	2	4	1	2	4		5	5	3	1	1	1	1	1	4	1	3	2	5	1	4	1	1	2	4	5	3	1	3	2	4
100	4	2	5	1	4	4	2	4	2	4	4	1	2	4	2	4	4	4	5	4	1	2	4	1					3	1	2	4	2	1	3	1	0	1	4	0	1	3	4	1	2	2	4	3	4
101	3	2	4	1	2	4	4	4	2	5	4	2	2	4	2	4	4	2	3	4	1	2	4	3					2	1	2	2	4	2	3	2	4	1	1	2	1	2	4	1	2	3	2	2	4
102	1	4	2	1	2	4	4	4	2	4	4	4	3	2	2	5	3	1	1	4	1	2	4		5	5	5	1	1	1	1	2	4	4	4	1	4	1	4	2	1	4	4	2	3	1	1	3	4
103	4	2	4	2	2	4	3	2	4	3	4	1	2	4	3	4	4	4	4	3	1	2	4	2					2	2	2	4	3	2	3	1	2	1	3	2	1	2	4	1	3	3	3	2	4
104	2	5	2	1	2	4	4	4	4	3	4	3	4	4	4	2	4	4	3	4	4	2	4		4	2	2	4	3	3	3	5	3	4	4	2	4	1	5	2	1	5	4	1	3	3	1	5	4
105	2	2	2	1	2	3	3	2	4	2	2	2	2	4	4	3	2	4	2	3	2	2	3	4					2	2	2	4	5	2	4	1	0	3	4	0	1	3	4	4	4	4	1	4	4
106	2	2	1	1	1	4	1	4	2	4	4	2	2	4	2	5	2	2	1	4	1	2	4	5					1	1	1	2	1	2	1	2	0	1	2	0	2	2	4	4	2	3	1	2	4
107	2	2	2	1	2	4	2	3	2	4	4	4	1	4	1	4	2	1	1	4	1	2	4	4					2	2	2	2	2	1	2	2	3	1	3	2	3	2	4	1	3	4	2	2	4
108	1	4	1	1	1	5	1	4	3	5	4	3	1	5	1	5	3	2	1	4	1	2	4	5					1	1	1	1	1	2	1	1	0	2	1	0	2	2	5	2	2	3	3	2	4
109	4	4	4	3	2	4	4	2	5	4	4	1	2	2	4	3	4	4	5	2	2	2	2	2					2	1	2	4	4	2	4	2	2	1	4	5	3	2	4	4	2	4	1	3	5
110	2	4	4	1	4	2	4	3	4	4	4	4	2	4	2	3	4	3	4	4	1	1	4	4					3	1	2	2	1	2	3	1	0	1	2	0	1	1	5	2	2	4	2	4	4
111	1	2	1	1	1	5	1	2	4	4	4	1	2	4	2	4	4	1	1	4	1	1	4	5					2	1	2	1	2	1	1	1	0	2	2	0	1	2	5	2	2	4	2	3	4
112	3	4	1	1	2	5	2	4	2	4	4	2	4	4	2	3	1	2	2	3	1	2	4	4					1	1	1	3	1	2	3	1	0	1	2	0	3	3	5	3	2	3	1	1	5
113	4	2	2	1	2	4	1	2	4	3	3	1	1	4	3	3	4	3	1	4	1	2	4	4					2	1	1	4	2	2	2	2	4	1	2	3	1	2	5	1	3	4	4	3	5
114	1	4	5	1	1	4	3	3	4	3	4	4	2	4	4	2	2	1	4	4	1	1	4		4	2	1	4	2	1	1	1	2	1	3	1	4	2	2	1	1	2	4	4	4	3	2	1	5
115	2	2	1	1	1	4	2	3	5	3	3	2	2	1	2	3	4	3	1	4	1	2	4	4					1	1	1	2	4	2	3	1	0	3	3	0	3	1	4	1	4	4	1	2	4
116	2	4	2	1	1	4	2	3	4	4	4	1	2	4	2	4	4	2	4	4	1	2	4	4					1	1	1	2	1	2	2	2	4	1	2	3	1	2	5	1	2	5	1	3	5
117	1	5	1	1	1	4	2	4	4	4	4	2	2	4	1	4	4	2	1	4	1	3	4		4	4	1	2	3	1	2	1	3	2	2	1	5	1	3	2	3	2	5	1	3	2	1	1	5
118	4	4	2	3	1	4	4	2	4	2	3	1	4	2	3	3	4	4	2	4	4	2	4	4					2	2	3	3	2	2	4	2	0	1	3	0	1	2	5	1	4	5	3	2	5
119	1	2	2	1	1	5	3	4	2	4	4	2	2	4	1	4	2	2	1	4	1	1	4	4					3	1	1	2	3	2	3	1	1	2	2	4	1	2	5	4	3	4	4	2	4
120	4	4	4	1	1	4	4	4	1	4	4	2	4	4	4	3	4	4	2	4	1	2	4	4					1	1	1	3	5	4	4	1	0	1	4	0	2	2	4	1	4	4	2	4	4
121	2	3	2	1	4	4	2	4	2	4	4	3	3	2	4	3	4	4	4	4	1	2	4	3					2	1	1	3	2	2	4	2	0	1	4	0	5	2	4	4	4	4	4	4	3
122	2	4	1	1	5	4	2	4	2	4	4	3	2	2	2	4	4	4	2	4	1	2	4	4					2	1	2	3	1	2	2	2	0	2	3	0	1	2	5	4	2	4	1	2	4
123	2	1	2	1	4	2	2	4	2	4	4	1	2	4	2	3	4	4	4	3	2	2	3	3					3	2	2	4	2	2	4	4	0	1	2	0	1	2	4	4	4	5	3	1	4
124	3	2	2	1	2	4	4	2	4	2	4	1	2	4	2	4	4	3	2	3	1	2	3	4					2	1	1	4	4	4	4	2	2	1	4	3	4	2	4	4	2	5	2	1	4
125	1	2	2	1	1	5	3	4	2	4	4	5	2	4	2	4	4	1	2	4	1	2	4	5					3	1	1	2	3	2	2	1	3	2	2	1	1	2	5	2	2	4	3	1	5
126	4	2	2	1	1	4	4	2	5	2	2	2	4	2	4	2	4	4	2	4	1	2	1	4					2	1	2	4	3	4	4	1	2	4	4	4	1	2	4	5	4	4	2	1	4
127	3	4	1	1	1	5	2	4	4	4	4	1	4	4	2	4	4	3	1	4	1	2	1	5					2	1	1	4	1	2	3	4	0	1	2	0	1	1	5	3	2	5	1	1	5
128	3	4	2	1	1	4	3	2	4	4	4	1	2	4	3	3	4	4	2	4	1	2	4	4					3	1	2	4	2	2	4	1	0	2	4	0	3	2	5	4	4	4	1	1	4
129	2	4	2	1	1	4	2	2	4	4	3	1	2	4	2	3	2	4	2	4	1	2	4	4					3	2	3	5	2	2	3	2	4	1	2	3	2	2	5	3	2	4	1	3	5
130	2	2	1	1	1	4	3	4	2	3	4	2	2	4	4	3	4	2	2	4	1	2	4	4					2	1	1	4	3	2	3	1	0	1	4	0	3	1	4	4	3	4	1	2	4
131	4	4	4	4	2	2	4	2	4	2	4	1	4	2	4	3	4	4	4	4	4	2	4	3					3	4	2	4	4	2	4	3	2	1	4	4	3	4	1	2	4	4	1	2	4
132	4	2	1	1	2	5	2	2	5	3	2	1	2	4	2	4	4	3	1	4	1	2	4		4	2	2	4	3	1	1	3	1	2	2	1	3	1	2	3	1	2	5	4	3	5	2	1	4
133	1	5	1	1	1	5	2	4	1	4	4	4	2	4	1	4	2	1	1	5	1	2	5	5					1	1	1	1	2	2	2	2	0	1	2	0	1	2	5	2	2	3	2	1	5
134	2	2	2	1	2	4	4	2	4	3	4	1	4	4	5	4	4	3	2	4	1	2	4	4					2	1	1	4	4	2	3	2	0	1	5	0	3	1	4	3	3	4	3	2	4
135	4	4	2	1	1	4	2	3	4	4	4	1	2	4	2	4	4	4	1	4	1	2	4	4					3	1	2	4	2	2	2	2	4	1	2	3	1	2	4	1	2	5	1	2	4
136	1	5	2	1	1	4	2	4	2	4	4	3	2	4	1	4	4	1	1	3	1	2	3	5					1	1	1	2	1	2	2	2	0	2	2	0	1	2	5	3	2	3	1	1	4
137	4	4	2	1	2	4	2	2	4	2	2	1	4	4	2	2	4	4	1	4	1	2	4	4					2	1	2	2	5	2	4	2	2	1	4	2	3	2	4	4	2	4	1	2	4
138	1	5	1	1	1	5	1	3	2	4	4	3	2	4	2	4	4	1	2	4	1	1	4	4					1	1	1	3	2	2	3	2	0	1	2	0	1	2	5	4	3	3	1	2	4
139	2	2	1	1	1	5	4	4	4	4	4	2	4	4	2	4	5	2	1	4	1	2	4	5					1	1	1	3	3	3	3	2	0	4	3	0	1	2	4	2	4	3	1	1	5
140	4	4	4	4	1	5	2	1	5	2	2	1	4	5	3	3	4	4	4	3	1	2	3	2					4	1	3	4	5	2	4	1	0	4	4	0	2	2	4	4	3	5	1	3	5
141	4	4	2	2	1	4	3	1	5	2	1	1	2	4	2	3	5	4	1	4	1	2	4	5					4	1	2	5	3	2	3	2	2	3	2	5	3	2	4	4	3	5	2	2	5
142	1	2	1	1	1	4	2	3	3	3	3	2	2	4	2	4	4	2	1	3	2	2	3	5					2	1	2	3	2	2	2	3	0	1	2	0	1	2	4	1	2	4	1	2	4
143	1	2	1	1	1	5	1	5	1	5	5	5	2	4	2	4	1	1	1	4	1	1	4	5					3	1	1	1	1	2	2	1	0	3	1	0	1	2	5	3	1	4	2	1	5
144	1	2	1	1	3	4	1	5	1	5	5	5	2	4	2	4	5	1	1	5	1	2	5		5	5	5	1	1	1	1	1	2	2	2	4	4	1	1	2	2	2	5	4	3	1	1	1	5
145	4	2	2	3	3	4	2	1	5	4	2	2	4	4	4	2	4	2	4	3	1	2	3	5					1	1	1	4	4	2	4	2	0	1	4	0	3	1	4	4	3	5	4	4	4
146	2	4	1	1	2	4	2	3	3	4	4	2	2	4	4	3	2	2	4	3	4	2	3	4					2	3	1	3	3	2	2	4	0	1	3	0	1	1	4	4	2	4	1	1	4
147	2	4	2	2	1	4	2	4	4	3	4	2	3	2	2	4	2	2	2	2	2	2	2	4					3	1	2	3	3	3	2	2	0	1	2	0	1	2	4	4	3	4	1	1	4
148	2	4	2	1	2	4	2	3	3	3	4	3	2	4	2	4	2	2	1	3	4	2	3	4					1	2	1	3	2	2	2	3	0	1	2	0	1	1	3	1	2	2	1	1	4
149	3	4	1	1	2	4	2	2	4	3	4	2	2	4	4	3	2	2	2	3	4	2	3	4					2	3	3	2	3	2	3	2	0	2	3	0	3	2	3	2	3	5	2	2	4
150	1	4	1	1	1	5	1	4	2	5	4	4	2	5	3	4	3	4	1	5	1	1	5	5					1	1	2	1	1	2	2	2	0	1	2	0	1	2	4	2	2	3	1	1	5
151	2	4	2	2	1	4	4	4	2	5	4	4	2	4	4	3	4	2	2	4	1	1	4		4	4	3	1	2	1	1	1	2	2	4	3	4	1	3	1	4	2	3	1	3	1	1	1	4
152	1	5	1	1	1	5	4	3	3	3	4	2	1	5	1	4	4	1	1	3	1	1	3	5					3	1	1	2	3	2	2	1	0	4	2	0	1	1	4	4	1	4	1	2	5
153	1	3	1	1	2	4	4	4	2	5	5	2	4	4	4	3	4	2	4	4	1	1	4		5	5	5	1	1	1	1	2	2	4	4	3	4	3	4	2	3	3	4	1	2	2	1	1	4
154	2	2	4	1	1	4	4	3	3	3	4	2	2	4	2	3	5	1	4	4	1	2	4	2					2	2	2	2	3	4	3	1	4	2	3	4	1	2	4	4	3	3	1	2	4
155	1	5	1	1	1	5	3	3	3	4	4	4	1	5	1	5	4	1	1	4	1	1	4	5					1	1	1	1	2	1	2	1	0	1	1	0	3	1	5	2	2	4	1	1	5
156	1	4	1	1	1	4	2	2	4	3	4	2	2	4	2	3	4	2	2	4	1	2	4	4					3	2	3	2	2	2	2	2	3	1	2	3	1	2	4	3	3	3	1	2	4
157	2	4	1	1	1	5	4	4	2	4	4	4	2	4	4	4	4	2	2	4	1	4	1		5	5	5	1	1	1	1	1	4	2	3	1	4	1	4	2	1	4	4	1	4	2	1	2	4
[truncated: 11 more columns]
